# Supplementary material
Source: Springer Nature journal article supplement (https://www.springermedizin.de/resource/supplementary/12245_2011_111_MOESM3_ESM.pdf/9672796)

# Contact system

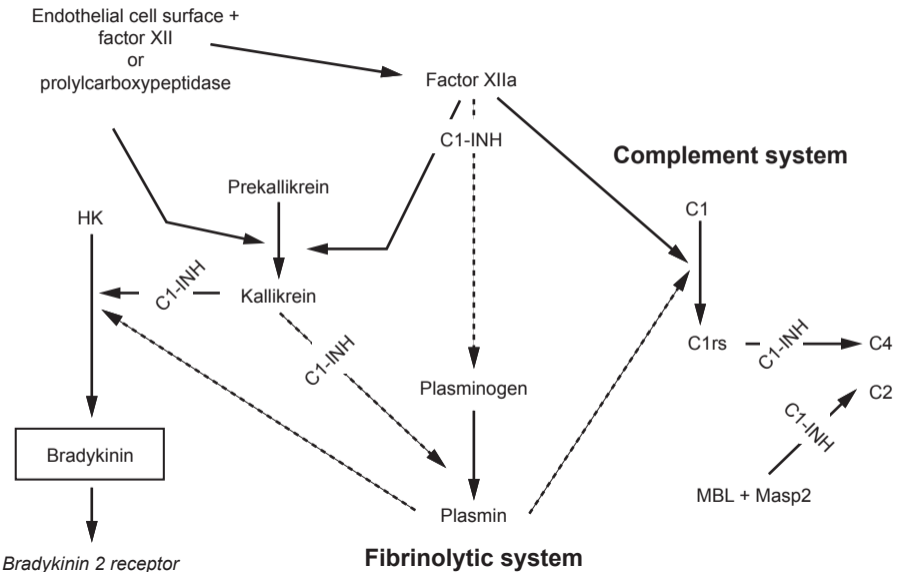

Supplement: MOESM3 [file 9672796]
